# Supplementary material
Source: Elsevier journal article supplement (https://www.sciencedirect.com/science/article/pii/S1853002819300023)
Supplement: mmc1 [file S1853002819300023:mmc1.pdf]

## MATERIAL SUPLEMENTARIO

### CUESTIONARIO PARA PACIENTES SOBRE PREFERENCIAS EN LOS SERVICIOS DE EMERGENCIAS

01. CUÁL FUE SU ACTIVIDAD LABORAL LA MAYOR PARTE DE SU VIDA:

.....

02. AHORA HABLAREMOS DE CÓMO FUE SU EDUCACIÓN. ¿QUÉ NIVEL EDUCATIVO MÁS ALTO CURSA O CURSÓ?

|                                                                                                          |  |
|----------------------------------------------------------------------------------------------------------|--|
| NINGUNO                                                                                                  |  |
| PRIMARIO                                                                                                 |  |
| EGB                                                                                                      |  |
| SECUNDARIO                                                                                               |  |
| POLIMODAL                                                                                                |  |
| SUPERIOR NO UNIVERSITARIO<br><i>Ej: profesorado, tecnicatura</i>                                         |  |
| UNIVERSITARIO                                                                                            |  |
| POST UNIVERSITARIO<br><i>Ej: maestrías, doctorados, especializaciones</i>                                |  |
| EDUCACIÓN ESPECIAL<br><i>Ej: Educación dirigida a personas que tienen problemas físicos o psíquicos.</i> |  |

03. ¿CUÁL ES EL ÚLTIMO QUE APROBÓ EN ESE NIVEL?

|             |  |
|-------------|--|
| GRADO O AÑO |  |
| NINGUNO     |  |
| IGNORADO    |  |

04. AÑOS TOTALES DE EDUCACIÓN FORMAL: .....

05. ¿ALGUNA VEZ FUMÓ CIGARRILLOS?

|                             |  |
|-----------------------------|--|
| SI                          |  |
| NO, (Pase a la pregunta 07) |  |

06. ¿CUÁNDO FUE LA ÚLTIMA VEZ QUE FUMÓ?

|                                 |  |
|---------------------------------|--|
| HACE UN DÍA O MENOS             |  |
| MÁS DE UN DÍA Y MENOS DE UN MES |  |
| ENTRE 1 Y 6 MESES               |  |
| ENTRE 7 MESES Y 1 AÑO           |  |
| MÁS DE 1 AÑO                    |  |

07. ¿CUÁNTAS VECES UN MÉDICO, UNA ENFERMERA U OTRO PROFESIONAL DE LA SALUD LE DIJO QUE TENÍA LA PRESIÓN ALTA?

|                       |  |
|-----------------------|--|
| SÓLO UNA VEZ          |  |
| MÁS DE UNA VEZ        |  |
| NINGUNA               |  |
| NO SABE O NO CONTESTA |  |

08. ¿EN ESTOS MOMENTOS ESTÁ HACIENDO ALGÚN TRATAMIENTO (MEDICAMENTOS, DIETA, EJERCICIO) INDICADO POR UN PROFESIONAL DE LA SALUD PARA CONTROLAR SU PRESIÓN ARTERIAL?

|         |  |
|---------|--|
| SI      |  |
| NO      |  |
| No Sabe |  |

09. ¿CUÁNTAS VECES UN MÉDICO, UNA ENFERMERA U OTRO PROFESIONAL DE LA SALUD LE DIJO QUE TENÍA EL COLESTERO ALTO o ELEVADO EN SANGRE?

|                       |  |
|-----------------------|--|
| SÓLO UNA VEZ          |  |
| MÁS DE UNA VEZ        |  |
| NINGUNA               |  |
| NO SABE O NO CONTESTA |  |

10. ¿EN ESTOS MOMENTOS ESTÁ HACIENDO ALGÚN TRATAMIENTO (MEDICAMENTOS, DIETA o EJERCICIO) INDICADO POR UN PROFESIONAL DE LA SALUD PARA CONTROLAR SU COLESTEROL?

|         |  |
|---------|--|
| SI      |  |
| NO      |  |
| No Sabe |  |

11. ¿ALGUNA VEZ UN DOCTOR, UNA ENFERMERA U OTRO PROFESIONAL DE LA SALUD LE DIJO QUE TENÍA DIABETES O AZÚCAR ALTA EN LA SANGRE?

|         |  |
|---------|--|
| SI      |  |
| NO      |  |
| No Sabe |  |

12. EN ESTOS MOMENTOS, ¿ESTÁ HACIENDO ALGÚN TRATAMIENTO (MEDICAMENTOS, DIETA, EJERCICIO) INDICADO POR UN PROFESIONAL DE LA SALUD PARA MANTENER CONTROLADA SU DIABETES/ AZÚCAR EN SANGRE?

|         |  |
|---------|--|
| SI      |  |
| NO      |  |
| No Sabe |  |

13. Test de Memoria MIS

|                 |  |
|-----------------|--|
| RESULTADO MIS = |  |
|-----------------|--|

14. EN CASO DE NECESITAR AYUDA MÉDICA URGENTE, ¿CUÁL CONSIDERA QUE SERÍA LA MANERA MÁS RÁPIDA DE CONSEGUIR ASISTENCIA MÉDICA?

Ambulancia

Guardia

Otros: \_\_\_\_\_

15. ¿Por qué eligió esa opción?

---
